# Supplementary material for: Long-term trends of global marine primary and secondary aerosol production during the recent global warming hiatus (2000–2015)
Source: Copernicus journal article supplement (doi:10.5194/acp-2018-322), 2018-05-02
Supplement: Supplementary file 1 [file acp-2018-322-supplement.pdf]

## Supplementary Material

### **Long-term trends of global marine primary and secondary aerosol production during the recent global warming hiatus (2000-2015)**

Sang-Keun Song<sup>a</sup>, Zang-Ho Shon<sup>b,1</sup>, Yu-Na Choi<sup>a</sup>, Young-Baek Son<sup>c</sup>, Minsung Kang<sup>b</sup>, Seung-Beom Han<sup>a</sup>, Min-Suk Bae<sup>d</sup>

<sup>a</sup> *Department of Earth and Marine Sciences, Jeju National University, Jeju 63243, Republic of Korea*

<sup>b</sup> *Department of Environmental Engineering, Dong-Eui University, Busan 47340, Republic of Korea*

<sup>c</sup> *Jeju International Marine Science Center for Research & Education, Korea Institute of Ocean Science & Technology (KIOST), Jeju 63349, Republic of Korea*

<sup>d</sup> *Department of Environmental Engineering, Mokpo National University, Muan 58554, Republic of Korea*

---

*Keywords:* Sea spray aerosol, DMS, Trend, AOD, OPAC

---

Corresponding author: Dept. of Environment Engineering, Dong-Eui University, 995 Eom Gwang No, Busan Jin Gu, Busan 47340, Republic of Korea; E-mail: zangho@deu.ac.kr; Tel: +82-51-890-2078; Fax: +82-51-890-2076

Supplementary Table 1. Summary of Mann–Kendall (MK) statistics of annual trends in dimethyl sulfide (DMS) fluxes ( $\mu\text{mol m}^{-2} \text{ yr}^{-1}$ ) for each latitude band ( $10^\circ$  interval between  $0^\circ$  and  $60^\circ$ ) over the global ocean during the study period (2000–2015).

| Latitude            | All            |                |                  |                  | MAM           |       |        | JJA           |       |        | SON           |       |        | DJF           |       |        |
|---------------------|----------------|----------------|------------------|------------------|---------------|-------|--------|---------------|-------|--------|---------------|-------|--------|---------------|-------|--------|
|                     | Q <sup>a</sup> | p <sup>b</sup> | Avg <sup>c</sup> | Std <sup>d</sup> | Q             | p     | Avg    |
| Northern Hemisphere |                |                |                  |                  |               |       |        |               |       |        |               |       |        |               |       |        |
| 50°-60°             | -0.365         | -0.16          | 239.4            | 210.6            | -0.365        | -0.04 | 100.7  | -1.825        | -0.13 | 169.4  | -13.14        | -1.76 | 619.8  | <b>-2.920</b> | -0.91 | 695.3  |
| 40°-50°             | <b>-4.745*</b> | -1.65          | 245.6            | 150.7            | <b>-3.650</b> | -0.36 | 140.5  | <b>-8.760</b> | -0.62 | 233.6  | -11.68        | -1.57 | 421.2  | -4.745        | -1.48 | 256.2  |
| 30°-40°             | <b>-10.22</b>  | -3.19          | 273.0            | 145.3            | <b>-4.380</b> | -0.44 | 162.8  | <b>-13.51</b> | -0.95 | 412.1  | <b>-14.97</b> | -2.01 | 308.1  | <b>-10.95</b> | -3.42 | 293.5  |
| 20°-30°             | <b>-8.760</b>  | -1.18          | 740.2            | 266.8            | -3.285        | -0.33 | 616.9  | <b>-23.36</b> | -1.64 | 1021.6 | <b>-10.59</b> | -1.42 | 231.0  | -6.935        | -2.16 | 277.8  |
| 10°-20°             | <b>-6.935</b>  | -0.49          | 1349.0           | 278.9            | <b>-10.22</b> | -1.02 | 1309.6 | <b>-20.81</b> | -1.46 | 1347.9 | <b>-12.78</b> | -1.72 | 804.8  | 10.95         | 3.42  | 523.4  |
| 0°-10°              | <b>-13.14</b>  | -1.31          | 953.7            | 234.7            | <b>-16.06</b> | -1.60 | 832.9  | <b>-21.90</b> | -1.54 | 1016.2 | <b>-15.33</b> | -2.06 | 1163.6 | 2.190         | 0.68  | 1595.4 |
| Southern Hemisphere |                |                |                  |                  |               |       |        |               |       |        |               |       |        |               |       |        |
| 0°-10°              | <b>-15.70</b>  | -1.45          | 1094.3           | 265.0            | -5.840        | -0.58 | 933.3  | -0.365        | -0.03 | 1428.2 | <b>-9.855</b> | -1.32 | 581.4  | -5.840        | -1.82 | 908.9  |
| 10°-20°             | -4.015         | -0.32          | 1246.5           | 203.7            | <b>-8.760</b> | -0.87 | 1247.2 | 8.030         | 0.56  | 1400.5 | -2.190        | -0.29 | 1084.4 | -9.125        | -2.85 | 1082.6 |
| 20°-30°             | -5.840         | -0.83          | 630.7            | 304.4            | <b>-12.41</b> | -1.24 | 720.9  | 0.000         | 0.00  | 337.3  | -6.935        | -0.93 | 1259.3 | <b>-10.22</b> | -3.19 | 927.8  |
| 30°-40°             | <b>-9.490</b>  | -4.17          | 189.4            | 117.5            | <b>-5.110</b> | -0.51 | 174.1  | <b>-6.570</b> | -0.46 | 161.3  | <b>-5.840</b> | -0.78 | 520.1  | <b>-8.760</b> | -2.73 | 287.6  |
| 40°-50°             | <b>-5.840</b>  | -1.06          | 390.9            | 207.0            | <b>-17.16</b> | -1.71 | 471.6  | -7.665        | -0.54 | 239.4  | <b>-5.110</b> | -0.69 | 132.1  | <b>-27.01</b> | -8.43 | 598.2  |
| 50°-60°             | <b>-18.62</b>  | -3.00          | 415.0            | 244.2            | <b>-19.71</b> | -1.96 | 545.7  | <b>-9.125</b> | -0.64 | 155.1  | <b>-11.32</b> | -1.52 | 261.0  | <b>-21.17</b> | -6.61 | 539.5  |

<sup>a</sup> Q is a slope of long-term trend calculated using the non-parametric Sen's method.

<sup>b</sup> %/yr.

<sup>c</sup> Average.

<sup>d</sup> Standard deviation.

\* Values in bold are statistically significant with 90% confidence level.

Supplementary Table 2. Summary of MK statistics of MODIS aerosol optical depth (AOD) for each latitude band (10° interval between 0° and 60°) over the global ocean during 2003–2015.

| Latitude                   | All             |                |                  |                  | MAM            |       |       | JJA            |       |       | SON            |       |       | DJF     |       |       |
|----------------------------|-----------------|----------------|------------------|------------------|----------------|-------|-------|----------------|-------|-------|----------------|-------|-------|---------|-------|-------|
|                            | Q <sup>a</sup>  | p <sup>b</sup> | Avg <sup>c</sup> | Std <sup>d</sup> | Q              | p     | Avg   | Q              | p     | Avg   | Q              | p     | Avg   | Q       | p     | Avg   |
| <b>Northern Hemisphere</b> |                 |                |                  |                  |                |       |       |                |       |       |                |       |       |         |       |       |
| 50°-60°                    | 0.0007          | 0.48           | 0.122            | 0.015            | -0.0040        | -2.18 | 0.137 | <b>0.0030</b>  | 1.74  | 0.144 | -0.0009        | -1.00 | 0.079 | 0.0009  | 1.59  | 0.067 |
| 40°-50°                    | -0.0003         | -0.20          | 0.130            | 0.011            | -0.0023        | -1.11 | 0.168 | 0.0013         | 0.70  | 0.152 | -0.0003        | -0.34 | 0.094 | 0.0003  | 0.36  | 0.097 |
| 30°-40°                    | <b>-0.0013*</b> | -0.80          | 0.164            | 0.009            | <b>-0.0014</b> | -0.61 | 0.215 | <b>-0.0025</b> | -1.24 | 0.183 | -0.0010        | -0.84 | 0.125 | -0.0001 | -0.09 | 0.127 |
| 20°-30°                    | 0.0000          | -0.01          | 0.191            | 0.006            | 0.0001         | 0.03  | 0.219 | -0.0007        | -0.30 | 0.235 | <b>-0.0009</b> | -0.61 | 0.159 | 0.0010  | 0.65  | 0.149 |
| 10°-20°                    | 0.0008          | 0.40           | 0.215            | 0.007            | -0.0003        | -0.12 | 0.249 | 0.0010         | 0.38  | 0.279 | -0.0001        | -0.07 | 0.172 | 0.0013  | 0.84  | 0.164 |
| 0°-10°                     | 0.0005          | 0.29           | 0.178            | 0.007            | -0.0007        | -0.36 | 0.194 | <b>0.0009</b>  | 0.60  | 0.165 | 0.0002         | 0.13  | 0.139 | 0.0006  | 0.32  | 0.192 |
| <b>Southern Hemisphere</b> |                 |                |                  |                  |                |       |       |                |       |       |                |       |       |         |       |       |
| 0°-10°                     | -0.0004         | -0.25          | 0.154            | 0.010            | -0.0001        | -0.07 | 0.121 | 0.0001         | 0.04  | 0.164 | -0.0014        | -0.89 | 0.166 | 0.0011  | 0.80  | 0.141 |
| 10°-20°                    | -0.0003         | -0.28          | 0.104            | 0.006            | 0.0006         | 0.78  | 0.078 | 0.0005         | 0.54  | 0.089 | -0.0007        | -0.50 | 0.146 | 0.0001  | 0.07  | 0.098 |
| 20°-30°                    | 0.0001          | 0.18           | 0.072            | 0.003            | <b>0.0004</b>  | 0.70  | 0.060 | 0.0001         | 0.23  | 0.058 | 0.0003         | 0.31  | 0.092 | 0.0000  | 0.01  | 0.076 |
| 30°-40°                    | 0.0002          | 0.32           | 0.073            | 0.004            | <b>0.0003</b>  | 0.51  | 0.059 | 0.0006         | 1.11  | 0.062 | 0.0004         | 0.49  | 0.090 | 0.0003  | 0.37  | 0.080 |
| 40°-50°                    | <b>0.0005</b>   | 0.59           | 0.080            | 0.005            | 0.0001         | 0.09  | 0.066 | <b>0.0006</b>  | 1.08  | 0.063 | <b>0.0007</b>  | 0.87  | 0.093 | 0.0003  | 0.30  | 0.099 |
| 50°-60°                    | <b>0.0008</b>   | 1.05           | 0.080            | 0.006            | 0.0000         | 0.04  | 0.068 | <b>0.0005</b>  | 0.87  | 0.057 | <b>0.0014</b>  | 1.73  | 0.088 | 0.0004  | 0.49  | 0.095 |

<sup>a</sup> Q is a slope of long-term trend calculated using the non-parametric Sen's method.

<sup>b</sup> %/yr.

<sup>c</sup> Average.

<sup>d</sup> Standard deviation.

\* Values in bold are statistically significant with 90% confidence level.

Supplementary Table 3. Seasonal variations in AOD derived from sea spray aerosol (SSA) emissions ( $AOD_{SSA}$ ) for each latitude band over the global ocean during the study period (2000–2015).

|                            | MAM    | JJA    | SON    | DJF    | Average |
|----------------------------|--------|--------|--------|--------|---------|
| <b>Northern Hemisphere</b> |        |        |        |        |         |
| 50°-60°                    | 0.0227 | 0.0205 | 0.0247 | 0.0294 | 0.0240  |
| 40°-50°                    | 0.0227 | 0.0213 | 0.0235 | 0.0281 | 0.0239  |
| 30°-40°                    | 0.0220 | 0.0225 | 0.0216 | 0.0268 | 0.0232  |
| 20°-30°                    | 0.0260 | 0.0278 | 0.0268 | 0.0265 | 0.0268  |
| 10°-20°                    | 0.0332 | 0.0330 | 0.0289 | 0.0345 | 0.0324  |
| 0°-10°                     | 0.0282 | 0.0291 | 0.0264 | 0.0304 | 0.0285  |
| Average                    | 0.0258 | 0.0257 | 0.0253 | 0.0293 | 0.0265  |
| <b>Southern Hemisphere</b> |        |        |        |        |         |
| 0°-10°                     | 0.0269 | 0.0333 | 0.0304 | 0.0280 | 0.0296  |
| 10°-20°                    | 0.0311 | 0.0377 | 0.0352 | 0.0292 | 0.0333  |
| 20°-30°                    | 0.0273 | 0.0254 | 0.0271 | 0.0290 | 0.0272  |
| 30°-40°                    | 0.0219 | 0.0240 | 0.0226 | 0.0227 | 0.0228  |
| 40°-50°                    | 0.0304 | 0.0317 | 0.0321 | 0.0307 | 0.0312  |
| 50°-60°                    | 0.0368 | 0.0344 | 0.0371 | 0.0342 | 0.0355  |
| Average                    | 0.0291 | 0.0311 | 0.0307 | 0.0290 | 0.0299  |

Supplementary Table 4. Seasonal variations in AOD derived from SSA and DMS ( $AOD_{SSA+DMS}$ ) for each latitude band over the global ocean during the study period (2000–2015).

|                            | MAM    | JJA    | SON    | DJF    | Average |
|----------------------------|--------|--------|--------|--------|---------|
| <b>Northern Hemisphere</b> |        |        |        |        |         |
| 50°-60°                    | 0.0449 | 0.0456 | 0.0572 | 0.0562 | 0.0497  |
| 40°-50°                    | 0.0459 | 0.0471 | 0.0526 | 0.0569 | 0.0510  |
| 30°-40°                    | 0.0458 | 0.0553 | 0.0482 | 0.0569 | 0.0519  |
| 20°-30°                    | 0.0679 | 0.0843 | 0.0758 | 0.0660 | 0.0737  |
| 10°-20°                    | 0.1023 | 0.1035 | 0.0902 | 0.1123 | 0.1008  |
| 0°-10°                     | 0.0821 | 0.0873 | 0.0760 | 0.0953 | 0.0854  |
| Average                    | 0.0648 | 0.0705 | 0.0667 | 0.0739 | 0.0688  |
| <b>Southern Hemisphere</b> |        |        |        |        |         |
| 0°-10°                     | 0.0791 | 0.1063 | 0.0893 | 0.0795 | 0.0895  |
| 10°-20°                    | 0.0953 | 0.1102 | 0.1015 | 0.0872 | 0.0987  |
| 20°-30°                    | 0.0731 | 0.0569 | 0.0654 | 0.0837 | 0.0695  |
| 30°-40°                    | 0.0465 | 0.0476 | 0.0455 | 0.0525 | 0.0480  |
| 40°-50°                    | 0.0662 | 0.0567 | 0.0591 | 0.0711 | 0.0640  |
| 50°-60°                    | 0.0771 | 0.0569 | 0.0631 | 0.0714 | 0.0683  |
| Average                    | 0.0729 | 0.0724 | 0.0706 | 0.0742 | 0.0730  |

Supplementary Table 5. Seasonal variations in MODIS AOD for each latitude band over the global ocean during 2003–2015.

|                            | MAM   | JJA   | SON   | DJF   | Average |
|----------------------------|-------|-------|-------|-------|---------|
| <b>Northern Hemisphere</b> |       |       |       |       |         |
| 50°-60°                    | 0.139 | 0.146 | 0.086 | 0.067 | 0.110   |
| 40°-50°                    | 0.169 | 0.153 | 0.095 | 0.097 | 0.129   |
| 30°-40°                    | 0.217 | 0.185 | 0.126 | 0.127 | 0.164   |
| 20°-30°                    | 0.220 | 0.236 | 0.159 | 0.149 | 0.191   |
| 10°-20°                    | 0.246 | 0.278 | 0.172 | 0.164 | 0.215   |
| 0°-10°                     | 0.193 | 0.165 | 0.137 | 0.192 | 0.172   |
| Average                    | 0.197 | 0.194 | 0.129 | 0.133 | 0.164   |
| <b>Southern Hemisphere</b> |       |       |       |       |         |
| 0°-10°                     | 0.121 | 0.164 | 0.164 | 0.141 | 0.148   |
| 10°-20°                    | 0.077 | 0.089 | 0.145 | 0.098 | 0.102   |
| 20°-30°                    | 0.059 | 0.058 | 0.091 | 0.076 | 0.071   |
| 30°-40°                    | 0.058 | 0.062 | 0.090 | 0.080 | 0.073   |
| 40°-50°                    | 0.065 | 0.061 | 0.092 | 0.099 | 0.079   |
| 50°-60°                    | 0.068 | 0.055 | 0.085 | 0.095 | 0.076   |
| Average                    | 0.075 | 0.082 | 0.111 | 0.098 | 0.092   |

Supplementary Table 6. Seasonal contributions of AOD<sub>SSA</sub> to MODIS AOD for each latitude band over the global ocean during 2003–2015.

|                            | MAM  | JJA  | SON  | DJF  | Average |
|----------------------------|------|------|------|------|---------|
| <b>Northern Hemisphere</b> |      |      |      |      |         |
| 50°-60°                    | 19.9 | 23.6 | 43.2 | 64.5 | 35.4    |
| 40°-50°                    | 17.7 | 20.9 | 30.2 | 39.8 | 27.2    |
| 30°-40°                    | 15.1 | 21.3 | 25.2 | 32.5 | 23.4    |
| 20°-30°                    | 20.0 | 25.5 | 31.4 | 32.2 | 27.3    |
| 10°-20°                    | 22.8 | 21.9 | 26.8 | 33.8 | 26.4    |
| 0°-10°                     | 21.5 | 25.3 | 26.2 | 23.7 | 24.0    |
| Average                    | 19.5 | 23.1 | 30.5 | 37.8 | 27.3    |
| <b>Southern Hemisphere</b> |      |      |      |      |         |
| 0°-10°                     | 27.5 | 30.3 | 27.4 | 25.2 | 27.8    |
| 10°-20°                    | 39.4 | 50.7 | 34.4 | 31.7 | 39.3    |
| 20°-30°                    | 43.7 | 45.1 | 32.0 | 38.3 | 39.8    |
| 30°-40°                    | 41.4 | 44.0 | 28.5 | 32.8 | 36.8    |
| 40°-50°                    | 56.7 | 65.1 | 40.0 | 36.0 | 49.5    |
| 50°-60°                    | 74.2 | 93.3 | 51.8 | 42.5 | 62.2    |
| Average                    | 47.1 | 54.7 | 35.7 | 34.4 | 42.6    |

Supplementary Table 7. Seasonal contributions of AOD<sub>SSA+DMS</sub> to MODIS AOD for each latitude band over the global ocean during 2003–2015.

|                     | MAM   | JJA   | SON  | DJF  | Average |
|---------------------|-------|-------|------|------|---------|
| Northern Hemisphere |       |       |      |      |         |
| 50°-60°             | 32.1  | 43.1  | 74.4 | 68.9 | 52.0    |
| 40°-50°             | 30.8  | 38.2  | 61.7 | 66.5 | 49.9    |
| 30°-40°             | 30.1  | 50.2  | 53.3 | 61.7 | 48.5    |
| 20°-30°             | 49.7  | 71.6  | 82.6 | 74.9 | 69.7    |
| 10°-20°             | 66.3  | 64.3  | 78.2 | 98.8 | 77.4    |
| 0°-10°              | 55.5  | 63.7  | 62.6 | 67.0 | 62.1    |
| Average             | 44.1  | 55.2  | 68.8 | 73.0 | 59.9    |
| Southern Hemisphere |       |       |      |      |         |
| 0°-10°              | 72.4  | 85.7  | 71.3 | 63.7 | 73.4    |
| 10°-20°             | 100.0 | 100.0 | 92.6 | 89.7 | 100.0   |
| 20°-30°             | 99.8  | 95.5  | 74.7 | 99.3 | 95.3    |
| 30°-40°             | 82.6  | 81.7  | 54.4 | 71.7 | 70.2    |
| 40°-50°             | 100.0 | 94.5  | 70.1 | 78.9 | 88.3    |
| 50°-60°             | 100.0 | 95.3  | 78.6 | 81.3 | 89.4    |
| Average             | 92.5  | 92.1  | 73.6 | 80.8 | 86.1    |



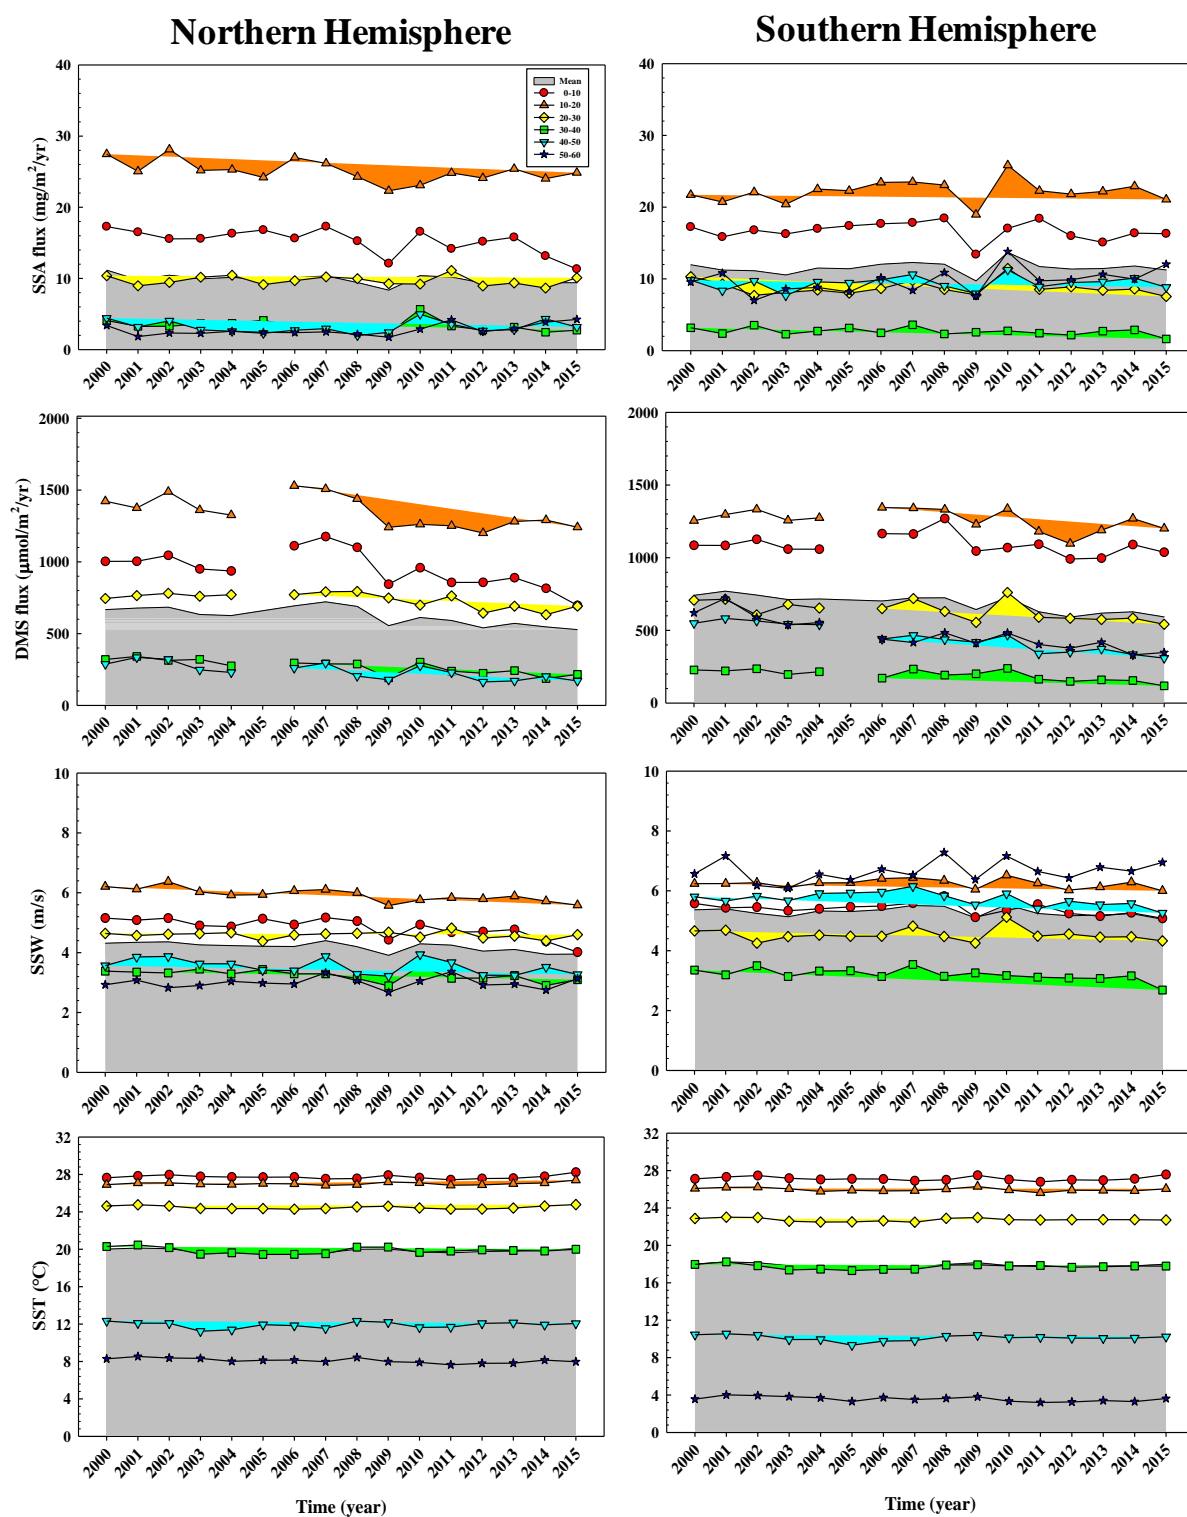

Supplementary Fig. 1. Yearly variations in sea spray aerosol (SSA) emissions, dimethyl sulfide (DMS) fluxes, sea surface wind (SSW), and sea surface temperature (SST) for each latitude band ( $10^\circ$  interval) during the entire study period (2000–2015). DMS fluxes in 2005 were excluded due to the unavailability of mixed layer depth (MLD) data from January to June 2005.

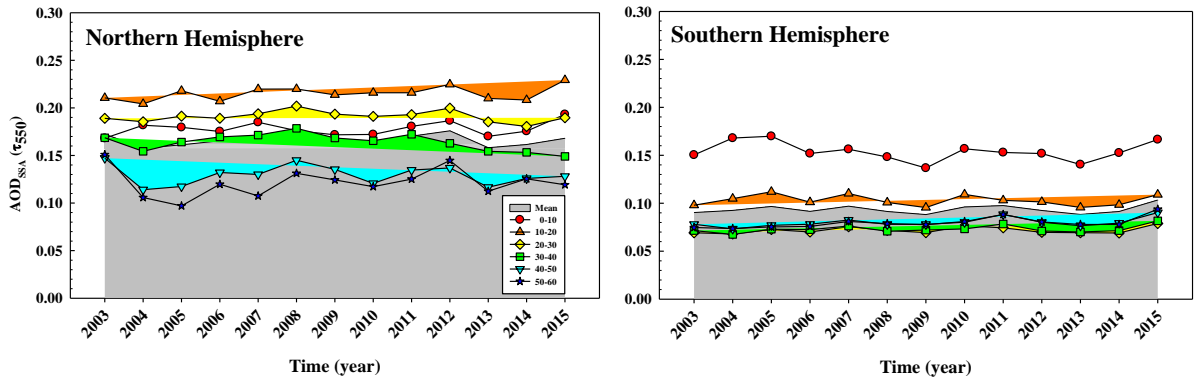

(a)

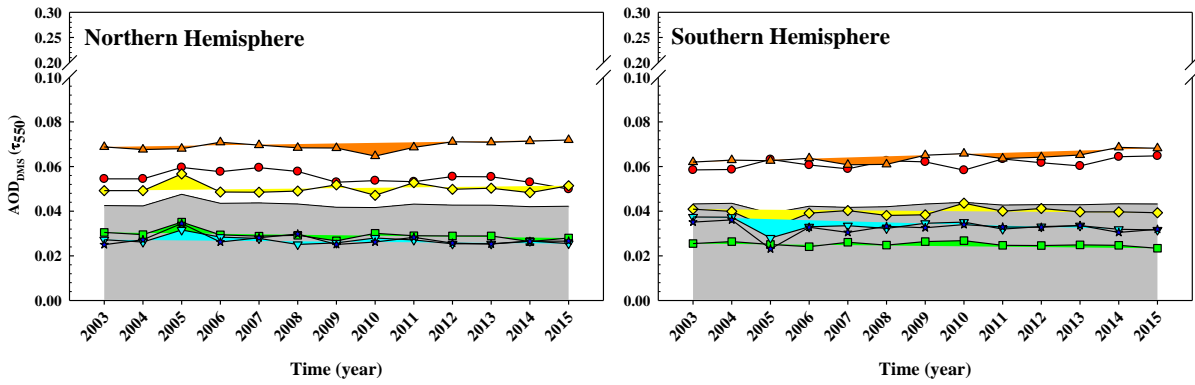

(b)

Supplementary Fig. 2. Yearly variations in (a) AOD ( $\tau_{550}$ ) derived from SSA emissions ( $AOD_{SSA}$ ) and (b) DMS fluxes ( $AOD_{DMS}$ ) zonally averaged over the latitude bands ( $10^\circ$  interval between  $0^\circ$  and  $60^\circ$ ) during 2003–2015.
